# Supplementary material for: Green Power Generation by Microbial Fuel Cells Using Pharmaceutical Wastewater as Substrate and Electroactive Biofilms (Bacteria/Biocarbon)
Source: Hindawi journal article supplement (doi:10.1155/2022/1963973), 2022-08-28
Supplement: f1 [file 1963973.f1.docx]

**Supplementary information**

Green power generation by microbial fuel cells using pharmaceutical wastewater as substrate and electroactive biofilms (bacteria/biocarbon).

C.A. Cobos-Reyes1, I.L. Alonso-Lemus2,*, M:Z. Figueroa-Torres3, B. Escobar-Morales4, Aruna K Kunhiraman5 , Akash Prabhu5, F. Fernández-Luqueño1, F.J. Rodríguez-Varela1,

**Experimental**

**Bacteria inoculation**

A strain of bacteria (*B. subtilis* or *E. coli*) was inoculated using Luria-Bertani (LB) medium into a Erlenmeyer flask, which was incubated for 5 days at 28 °C. Then, the bacteria were transferred to a Petri dish with agar and incubated for 4 days at 35 °C. Finally, the Petri dishes were storage at 4 °C until used in this work. The nutritional composition of LB medium is shown in table S1.

**Table S1. Nutritional information of Luria-Bertani (LB) medium**

| Component | Amount |
| --- | --- |
| Casein peptone | 10 g |
| Yeast extract | 5 g |
| Sodium chloride | 10 g |
| Water | 1000 mL |

**Alkalinization treatment of the Nafion 117 membrane.**

Nafion® 117 (DuPont) membranes were cut into square pieces of 5 cm by 5 cm in size, then, they were immersed in an aqueous solution of hydrogen peroxide (10% v/v) at 60 °C for 1 hour. Afterwards, the membranes were immersed for washing in Deionized Water at Boiling Point (DWBP) for 0.5 minutes. Subsequently, the membranes were immersed in 0.5 mol L-1 H2SO4 aqueous solution at 85 °C for 1 hour, then they were washed with DWBP for 5 minutes and immersed in 6 mol L-1 KOH aqueous solution at room temperature for 19 hours. Finally, the membranes were washed three times with DWBP and stored in an amber glass straight-sided round jar with deionized water at room temperature.


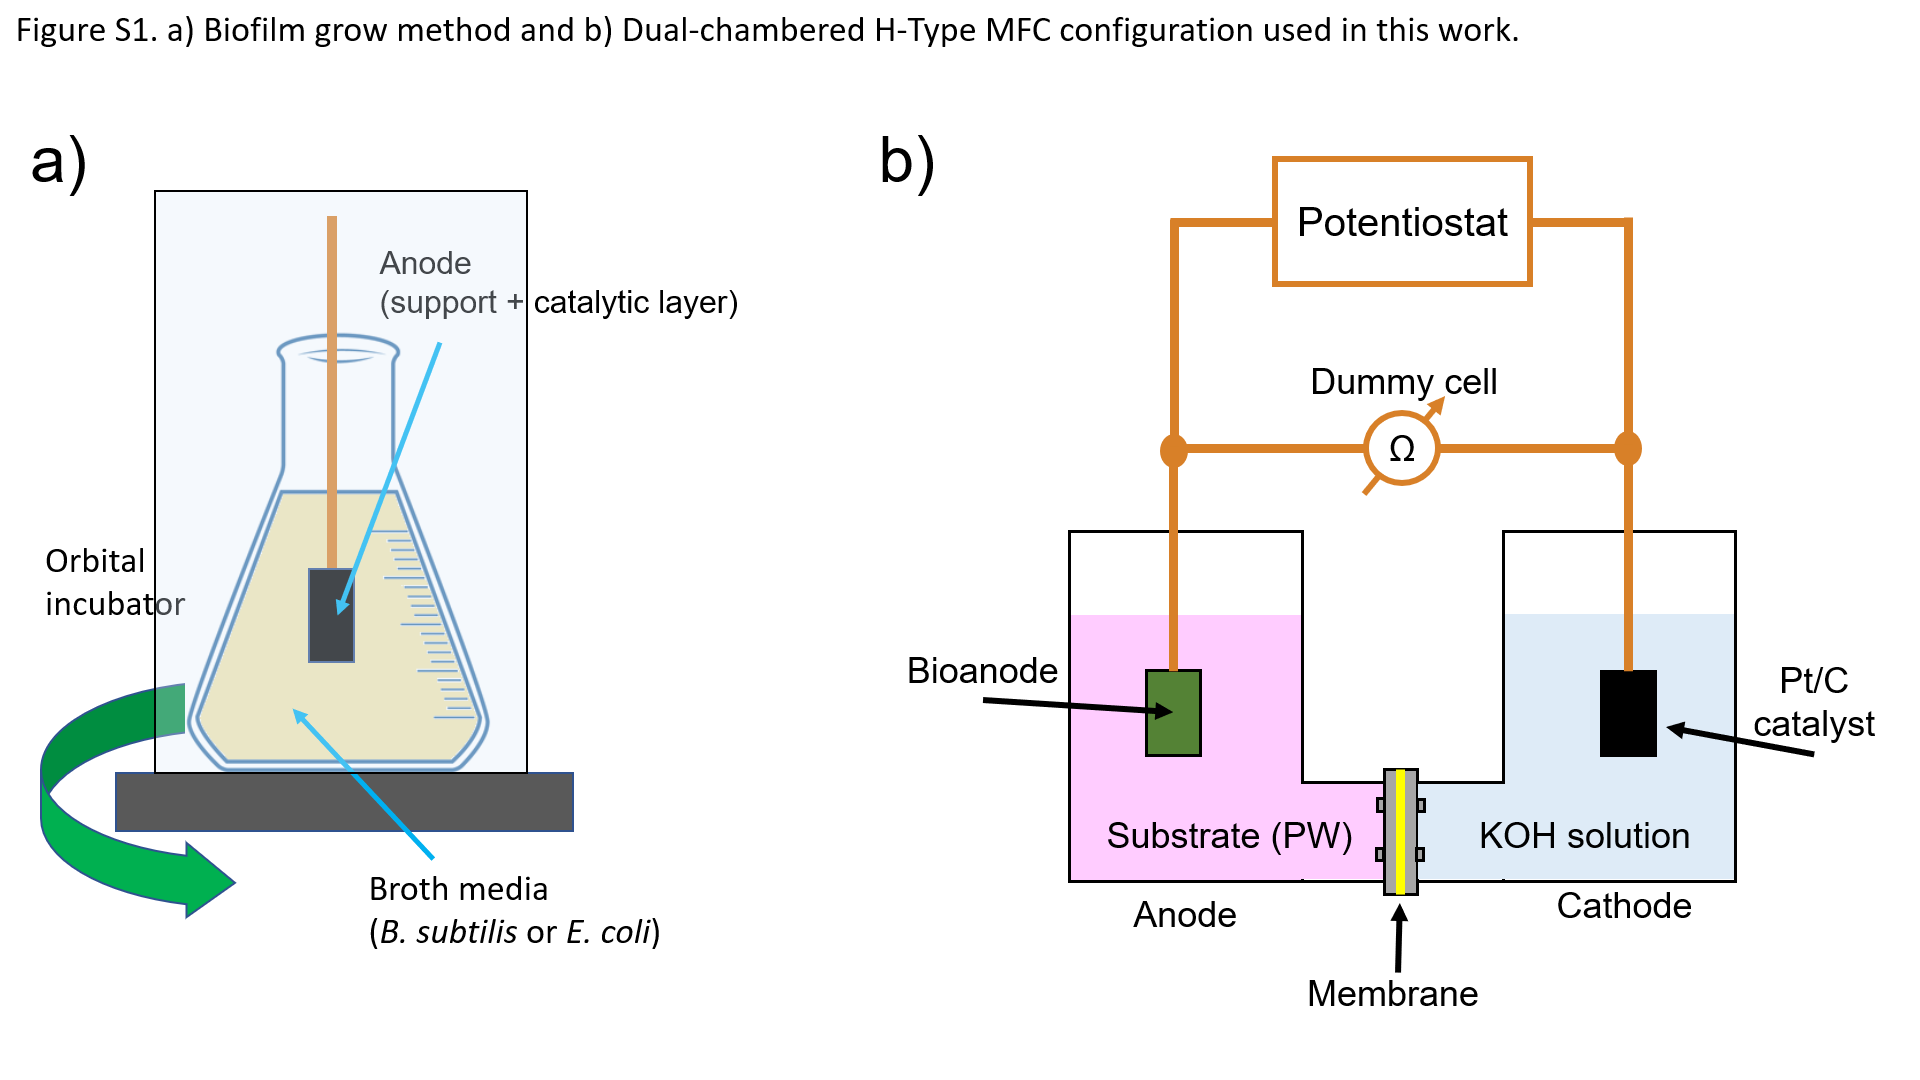


Figure S1. a) Biofilm grow method and b) Dual-chambered H-Type MFC configuration used in this work.

Table S2. Chemical composition of leather and leather-derived catalysts determined by EDS technique.

| **Sample** | **Element (wt. %)** | | | | | | | |
| --- | --- | --- | --- | --- | --- | --- | --- | --- |
| **C** | **O** | **N** | **S** | **Ca** | **Na** | **Mg** | **Si** |
| Leather | 69.62 | 18.89 | 4.13 | 3.10 | 2.30 | 0.94 | 0.59 | 0.43 |
| AB7 | 89.75 | 7.49 | 2.43 | 0.16 | ND | ND | 0.17 | ND |
| AB7-f | 89.88 | 7.58 | 2.33 | 0.07 | ND | ND | 0.14 | ND |


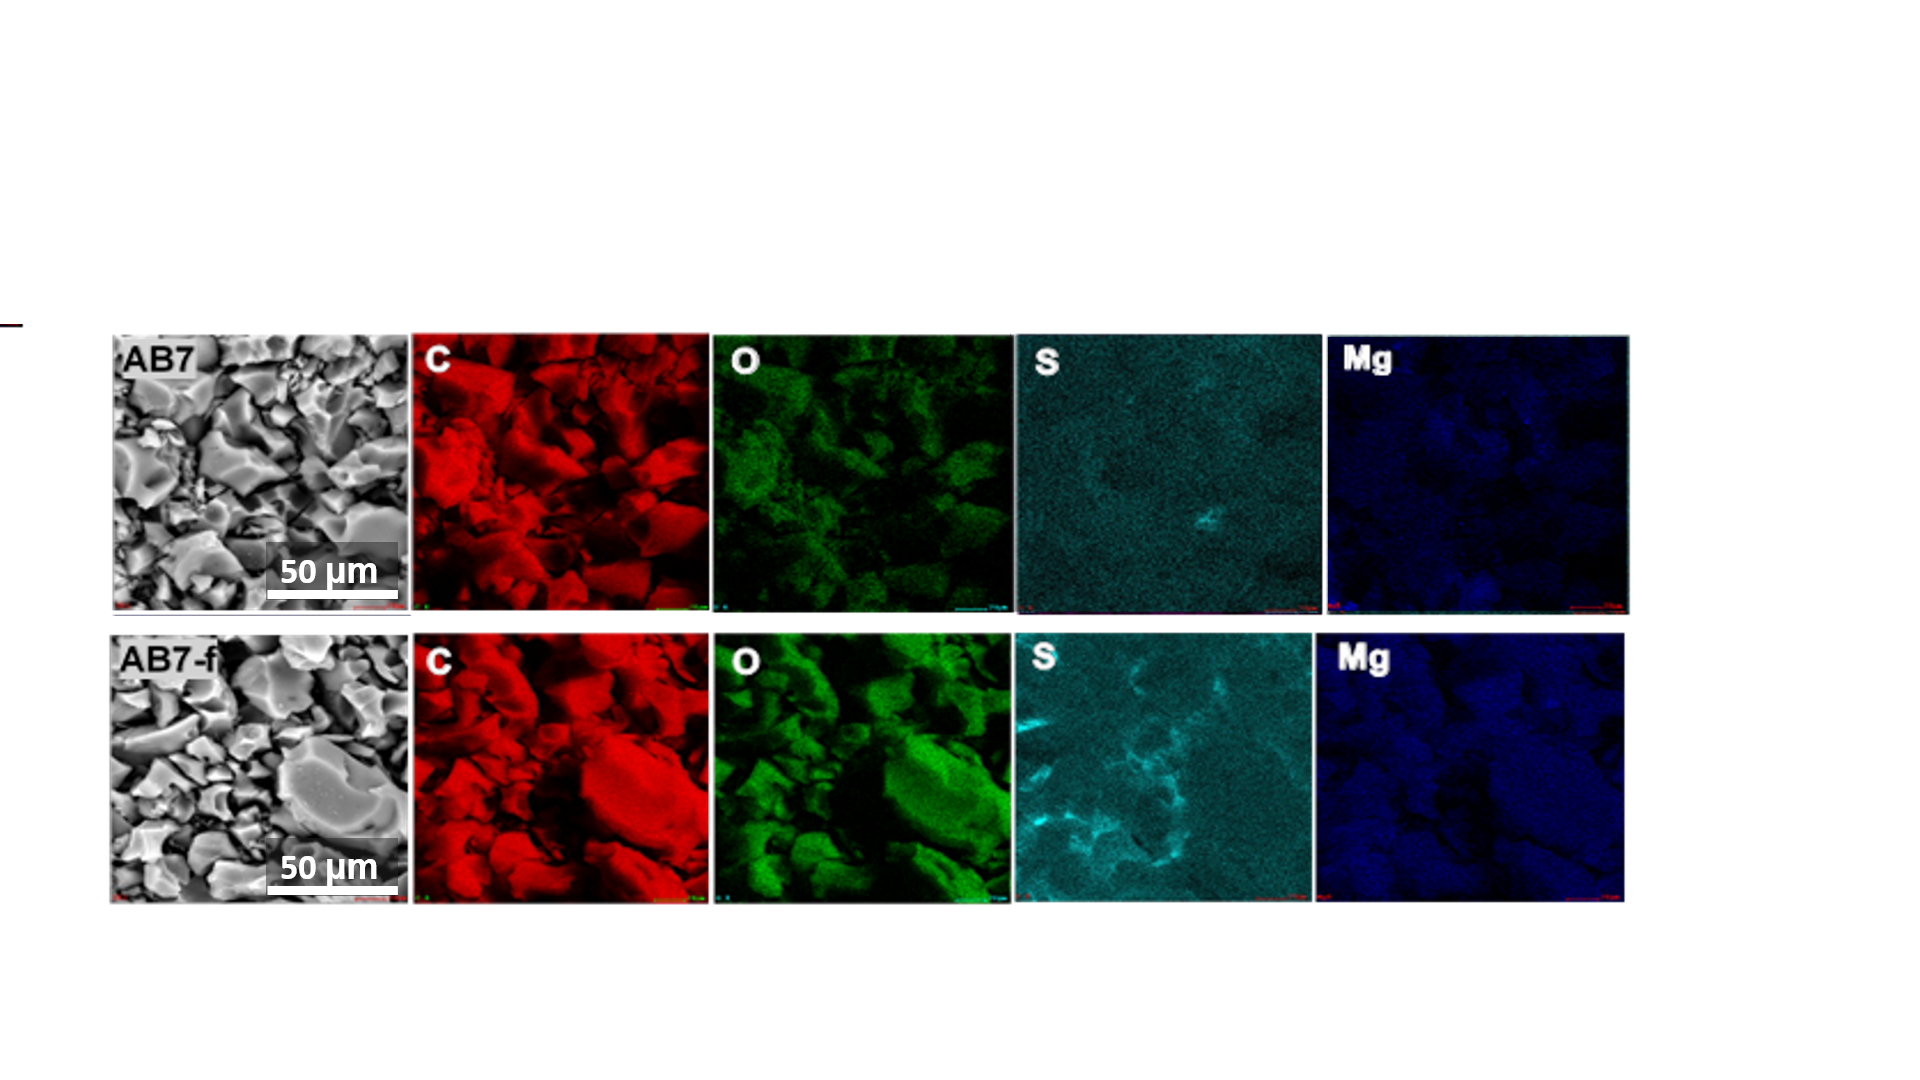


Figure S2. Elemental mapping of the leather waste-derived catalyst AB7 and AB7-f

Table S3. Reports of different MFC configurations and the maximum power density compared with this work.

| **MFC (electrode)** | **Substrate** | **Maximum Pcell**  **(mW m-2)** | **Bacteria** | **Reference** |
| --- | --- | --- | --- | --- |
| Dual chamber (carbon cloth). | Synthetic (sodium acetate and nutrients) | 15.6 | Mixed | [[1](#_ENREF_4)] |
| Dual chamber (carbon fiber) | Synthetic water from dairy industry. | 246 | Mixed | [[2](#_ENREF_98)] |
| Dual chamber (carbon felt) | Synthetic alkali-hydrolysis of municipal waste | 30.47 | Mixed | [[3](#_ENREF_99)] |
| Dual chamber (carbon cloth + polyaniline) | Synthetic water (sodium acetate) | 65 | Mixed | [[4](#_ENREF_100)] |
| Tubular single chamber (carbon cloth) | Synthetic media with benzene and phenanthrene | 6.7 | Mixed | [[5](#_ENREF_24)] |
| Single chamber (carbon felt) | Synthetic media with glucose and phenol. | 31.3 | Mixed | [[6](#_ENREF_101)] |
| Dual chamber (graphite plate covered with carbon paper) | Sulphurated water | 17.6 | Mixed | [[7](#_ENREF_102)] |
| Dual chamber (carbon paper) | Synthetic media and cellulose | 190.2 | Mixed | [[8](#_ENREF_86)] |
| Dual chamber (carbon paper) | Synthetic media and cellulose | 162 | *Nocardiopsis sp.* | [[8](#_ENREF_86)] |
| Dual chamber  (carbon cloth) | Synthetic media | 0.001 | *B. subtilis* | [[9](#_ENREF_91)]  [[10](#_ENREF_103)] |
| Dual chamber (graphite rod and carbon cloth) | Sewage sludge | 93 | Mixed | [[11](#_ENREF_104)] |
| **Dual-chamber (carbon cloth + AB7-f)** | **PWW** | **96.3** | ***B. subtilis*** | **This work** |

[1] Water Sci. Technol. 73 (2016) 2849-57.

[2] J. Clean. Prod. 140 (2017) 971-976.

[3] Waste Manag Res. 34 (2016) 619-29.

[4] Bioresour. Technol. 219 (2016) 37-44.

[5] Int. Biodeterior. Biodegrad. 116 (2017) 91-103.

[6] Bioprocess Biosyst Eng. 37 (2014) 133-8.

[7] J. Hazard. Mater. 284 (2015) 182-9.

[8] Enzyme Microb. Technol. 51 (2012) 269-73.

[9] J. Power Sources. 190 (2009) 258-263.

[10] J. Power Sources. 195 (2010) 5427-5428.

[11] Fuel 107 (2013) 382-386.
